# Supplementary material for: Acquisition of Amantadine Resistance via M Gene Reassortment in Canine H3N2 Influenza Virus and Elucidation of the Resistance Mechanism
Source: Research Square preprint supplement (doi:10.21203/rs.3.rs-8173350/v1), 2025-11-28
Supplement: Supplementary file 1 [file fa67b68d11563c9a0230e9be.docx]

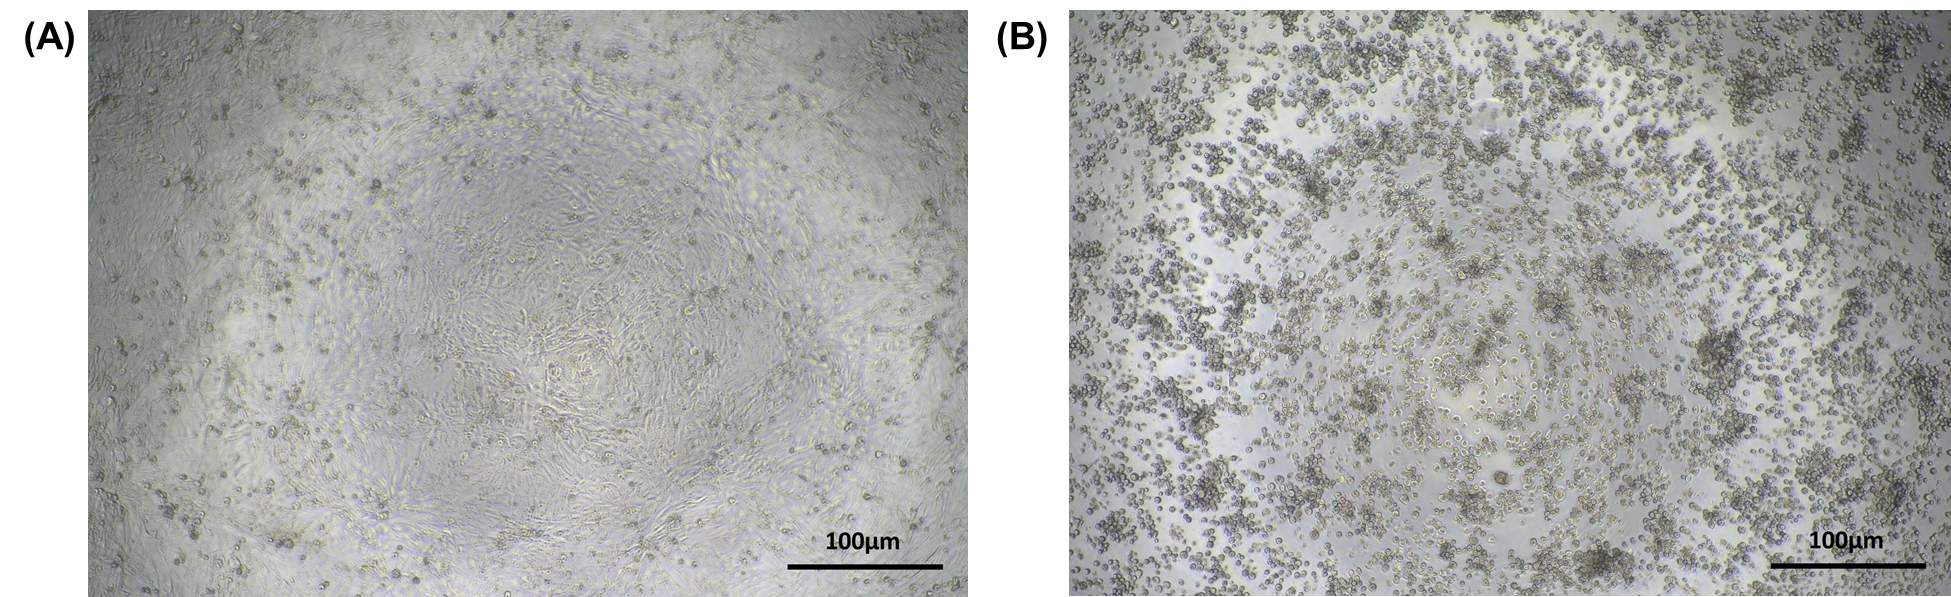


**Figure S1. Cytopathic effect (CPE) observed in influenza virus infected Madin-Darby canine kidney (MDCK) cells.**

(A) Normal, uninfected MDCK cells. (B) CPE such as rounding formation, cell destruction, and detachment, were observed in influenza virus infected MDCK cells.
